# Supplementary material for: Cellular Adhesion Promotes Prostate Cancer Cells Escape from Dormancy
Source: PubMed Central journal article supplement (PMC4475050; doi:10.1371/journal.pone.0130565), 2015-06-19
Supplement: pone.0130565.s001.pdf [file pone.0130565.s001.pdf]

# Supplementary Figure 1

A

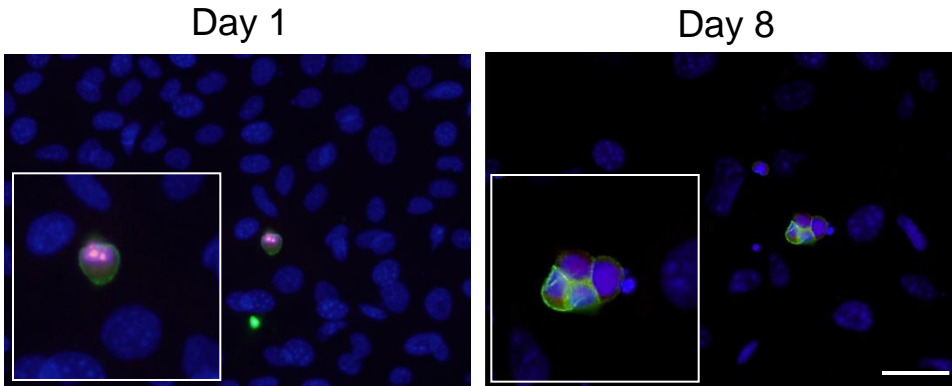

B

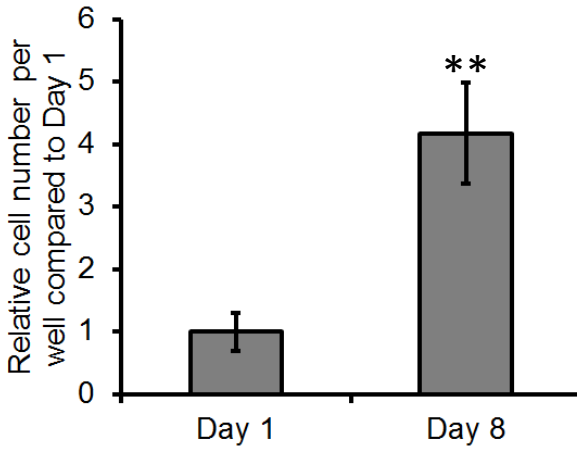

## S1 Fig. C4-2B cells grow on a monolayer of bone marrow stromal cells (BMSC) when seeded sparsely.

A) C4-2B cells were seeded sparsely (50 cells/cm<sup>2</sup>) on BMSC, cells were fixed with ice-cold methanol and fluorescently stained for Ki67 to assess proliferation. Green, EpCAM; Red, Ki67, Blue, DAPI. Magnification: 200x. Scale bar: 50  $\mu$ m. B) EpCAM-positive cells were counted on day 1 and day 7. Data are presented as mean $\pm$ S.D of two independent experiments. \*\*p<0.01 when compared to day 1.
